# Supplementary material for: Biomimetics for Sustainable Developments—A Literature Overview of Trends
Source: MDPI journal article supplement (doi:10.3390/biomimetics8030304), 2023-07-11
Supplement: s1 [file s1]

**Table S1:** Top 20 most cited papers for “biomimetics”. Retrieved on June 16, 2023, through Web of Science, all databases.

|    | Authors           | Year | Title                                                                                                     | Journal                                    | Document Type      | Times cited |
|----|-------------------|------|-----------------------------------------------------------------------------------------------------------|--------------------------------------------|--------------------|-------------|
| 1  | Armand & Tarascon | 2008 | Building better batteries                                                                                 | Nature                                     | Article            | 15438       |
| 2  | Kokubo & Takadama | 2006 | How useful is SBF in predicting in vivo bone bioactivity?                                                 | Biomaterials                               | Article            | 6855        |
| 3  | Gao et al.        | 2007 | Intrinsic peroxidase-like activity of ferromagnetic nanoparticles                                         | Nature Nanotechnology                      | Article            | 4330        |
| 4  | Rus & Tolley      | 2015 | Design, fabrication and control of soft robots                                                            | Nature                                     | Review             | 3213        |
| 5  | Zhang             | 2003 | Fabrication of novel biomaterials through molecular self-assembly.                                        | Nature Biotechnology                       | Article            | 2782        |
| 6  | Sheikh & Bovik    | 2006 | Image information and visual quality                                                                      | IEEE Transactions On Image Processing      | Article            | 2611        |
| 7  | Tuteja et al.     | 2007 | Designing superoleophobic surfaces                                                                        | Science                                    | Article            | 2483        |
| 8  | Prezioso et al.   | 2015 | Training and operation of an integrated neuromorphic network based on metal-oxide memristors              | Nature                                     | Article            | 1874        |
| 9  | Gladman et al.    | 2016 | Biomimetic 4D printing                                                                                    | Nature Materials                           | Article            | 1838        |
| 10 | Zhou et al.       | 2014 | All-Solid-State Z-Scheme Photocatalytic Systems                                                           | Advanced Materials                         | Article            | 1832        |
| 11 | Lee et al.        | 2007 | A reversible wet/dry adhesive inspired by mussels and geckos                                              | Nature                                     | Article            | 1627        |
| 12 | Kokubo et al.     | 2003 | Novel bioactive materials with different mechanical properties.                                           | Biomaterials                               | Article            | 1623        |
| 13 | Majumder et al.   | 2005 | Nanoscale hydrodynamics - Enhanced flow in carbon nanotubes                                               | Nature                                     | Editorial Material | 1567        |
| 14 | Lee et al.        | 2011 | A review of reverse osmosis membrane materials for desalination- Development to date and future potential | Journal Of Membrane Science                | Review             | 1566        |
| 15 | Chortos et al.    | 2016 | Pursuing prosthetic electronic skin                                                                       | Nature Materials                           | Review             | 1541        |
| 16 | Amini et al.      | 2012 | Bone tissue engineering: recent advances and challenges.                                                  | Critical Reviews In Biomedical Engineering | Article            | 1490        |

|    |                   |      |                                                                                                                     |                                                                                 |                    |      |
|----|-------------------|------|---------------------------------------------------------------------------------------------------------------------|---------------------------------------------------------------------------------|--------------------|------|
| 17 | Hu et al.         | 2011 | Erythrocyte membrane-camouflaged polymeric nanoparticles as a biomimetic delivery platform                          | Proceedings Of The National Academy Of Sciences Of The United States Of America | Article            | 1487 |
| 18 | Shepherd et al.   | 2011 | Multigait soft robot                                                                                                | Proceedings Of The National Academy Of Sciences Of The United States Of America | Article            | 1473 |
| 19 | Svenson & Tomalia | 2005 | Commentary - Dendrimers in biomedical applications - reflections on the field                                       | Advanced Drug Delivery Reviews                                                  | Editorial Material | 1469 |
| 20 | Bhushan & Jung    | 2011 | Natural and biomimetic artificial surfaces for superhydrophobicity, self-cleaning, low adhesion, and drag reduction | Progress In Materials Science                                                   | Review             | 1412 |

**Table S2:** Top 20 most cited papers for “biomimetics and sustainab\*”. Retrieved on June 16, 2023, through Web of Science, all databases.

|    | Authors             | Year | Article Title                                                                                                                    | Journal                                                                         | Document Type | Times cited |
|----|---------------------|------|----------------------------------------------------------------------------------------------------------------------------------|---------------------------------------------------------------------------------|---------------|-------------|
| 1  | Li et al.           | 2019 | Cocatalysts for Selective Photoreduction of CO <sub>2</sub> into Solar Fuels                                                     | Chemical Reviews                                                                | Review        | 1228        |
| 2  | Ozbolat & Hospodiuk | 2016 | Current advances and future perspectives in extrusion-based bioprinting                                                          | Biomaterials                                                                    | Review        | 857         |
| 3  | Zhao et al.         | 2014 | Porous Metal-Organic Frameworks for Heterogeneous Biomimetic Catalysis                                                           | Accounts Of Chemical Research                                                   | Review        | 619         |
| 4  | Walther et al.      | 2010 | Large-Area, Lightweight and Thick Biomimetic Composites with Superior Material Properties via Fast, Economic, and Green Pathways | Nano Letters                                                                    | Article       | 394         |
| 5  | Magnuson et al.     | 2009 | Biomimetic and Microbial Approaches to Solar Fuel Generation                                                                     | Accounts Of Chemical Research                                                   | Review        | 364         |
| 6  | Wakerley et al.     | 2019 | Bio-inspired hydrophobicity promotes CO <sub>2</sub> reduction on a Cu surface                                                   | Nature Materials                                                                | Article       | 333         |
| 7  | Wu et al.           | 2020 | H <sub>2</sub> S-activatable near-infrared afterglow luminescent probes for sensitive molecular imaging in vivo                  | Nature Communications                                                           | Article       | 290         |
| 8  | Madeo et al.        | 2019 | Caloric Restriction Mimetics against Age-Associated Disease: Targets, Mechanisms, and Therapeutic Potential                      | Cell Metabolism                                                                 | Review        | 287         |
| 9  | Zhang et al.        | 2014 | A Biomimetic Copper Water Oxidation Catalyst with Low Overpotential                                                              | Journal Of The American Chemical Society                                        | Article       | 281         |
| 10 | Solga et al.        | 2007 | The dream of staying clean: Lotus and biomimetic surfaces                                                                        | Bioinspiration & Biomimetics                                                    | Article       | 244         |
| 11 | MacVittie et al.    | 2013 | From cyborg lobsters to a pacemaker powered by implantable biofuel cells                                                         | Energy & Environmental Science                                                  | Article       | 235         |
| 12 | Guo et al.          | 2018 | Light-driven fine chemical production in yeast biohybrids                                                                        | Science                                                                         | Article       | 201         |
| 13 | Lee et al.          | 2018 | Photosynthetic artificial organelles sustain and control ATP-dependent reactions in a protocellular system                       | Nature Biotechnology                                                            | Article       | 190         |
| 14 | Kluwer et al.       | 2009 | Self-assembled biomimetic [2Fe2S]-hydrogenase-based photocatalyst for molecular hydrogen evolution                               | Proceedings Of The National Academy Of Sciences Of The United States Of America | Article       | 189         |
| 15 | Li et al.           | 2018 | Recent Advances in Intrinsic Self-Healing Cementitious Materials                                                                 | Advanced Materials                                                              | Article       | 176         |
| 16 | Liu et al.          | 2016 | Bioinspired Bifunctional Membrane for Efficient Clean Water Generation                                                           | Acs Applied Materials & Interfaces                                              | Article       | 175         |
| 17 | Diesendruck et al.  | 2014 | Mechanically triggered heterolytic unzipping of a low-ceiling-temperature polymer                                                | Nature Chemistry                                                                | Article       | 175         |

|    |                  |      |                                                                                        |                                  |        |     |
|----|------------------|------|----------------------------------------------------------------------------------------|----------------------------------|--------|-----|
| 18 | Zhang et al.     | 2020 | Self-healing cement concrete composites for resilient infrastructures: A review        | Composites Part B-Engineering    | Review | 168 |
| 19 | Zhao et al.      | 2014 | Biomimetic and bioinspired membranes: Preparation and application                      | Progress In Polymer Science      | Review | 163 |
| 20 | Ghasemlou et al. | 2019 | Bio-inspired sustainable and durable superhydrophobic materials: from nature to market | Journal Of Materials Chemistry A | Review | 146 |
